# Supplementary material for: Photocatalytic activity of ZnO/GaP1−xNxfor water splitting
Source: Royal Society of Chemistry journal article supplement (doi:10.1039/c5ta04732c), 2015-01-01
Supplement: c5ta04732c1.pdf [file c5ta04732c1.pdf]

## Supporting information

The GaP was nitrided at temperatures of 873, 973, 1023, 1073, and 1123K. The flow rate of  $\text{NH}_3$  was  $300 \text{ mL min}^{-1}$  and nitridation time was 3 h. The diffraction patterns of the samples after nitridation were nearly the same as that of GaP before nitridation except for the appearance of a very small peak due to GaN. Fig. S1 shows the main X-ray diffraction peak of GaP in the region  $2\theta=28 - 29^\circ$  nitrided at various temperatures. No significant shifts of the peak by nitridation were observed.

Fig. S2 shows the SEM images of ZnO/GaN and ZnO/GaN-P(823, 0.07). Both powders have similar small particles-aggregated irregular forms. Neither the improvement of crystalline nor the preferable growth of specific planes was observed. There were little changes in the morphology of the photocatalysts.

Fig. S3 shows a plot of  $P/(N+P) \times 100 \%$  against the shifts of diffraction peak from GaP for a cluster model of  $\text{Ga}_{32}\text{P}_{32-y}\text{N}_y$  ( $y=1\sim 8$ ). With increasing N content, the diffraction angle caused a linear shift to higher diffraction angles. The diffraction angle shifts that provide the higher photocatalytic activity were in the range of  $2\theta=0.20\sim 0.44^\circ$ , as shown in Fig. 8 in the paper. The linear relation of Fig. S3 shows that the shifts are induced with 92.6~96.6% of P, that is, 3.4~7.4% involvement of N.

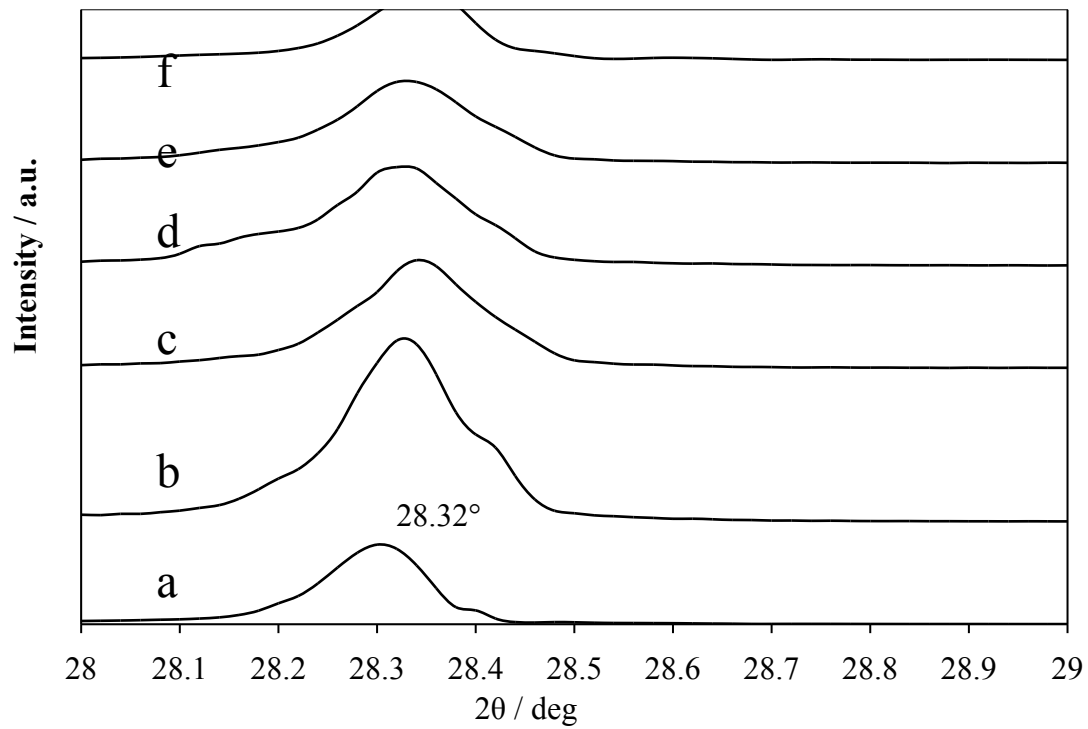

Fig. S1 X-ray diffraction peaks of GaP(a) in the region  $2\theta=28 - 29^\circ$  and the peaks after nitridation of GaP at various temperatures of 873(b), 973(c), 1023(d), 1073(e) and 1123K(f).

Fig. S2. SEM images of ZnO/GaN ((a)) and ZnO/GaN-P (823, 0.7)((b)).

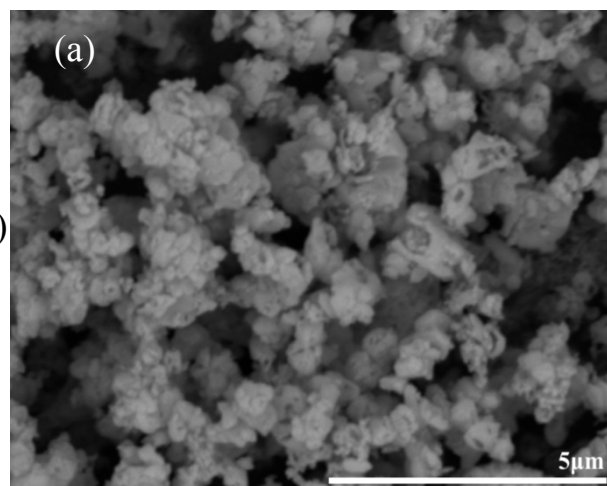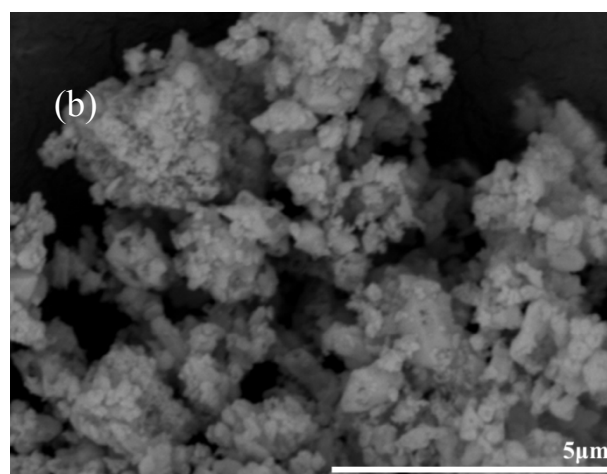

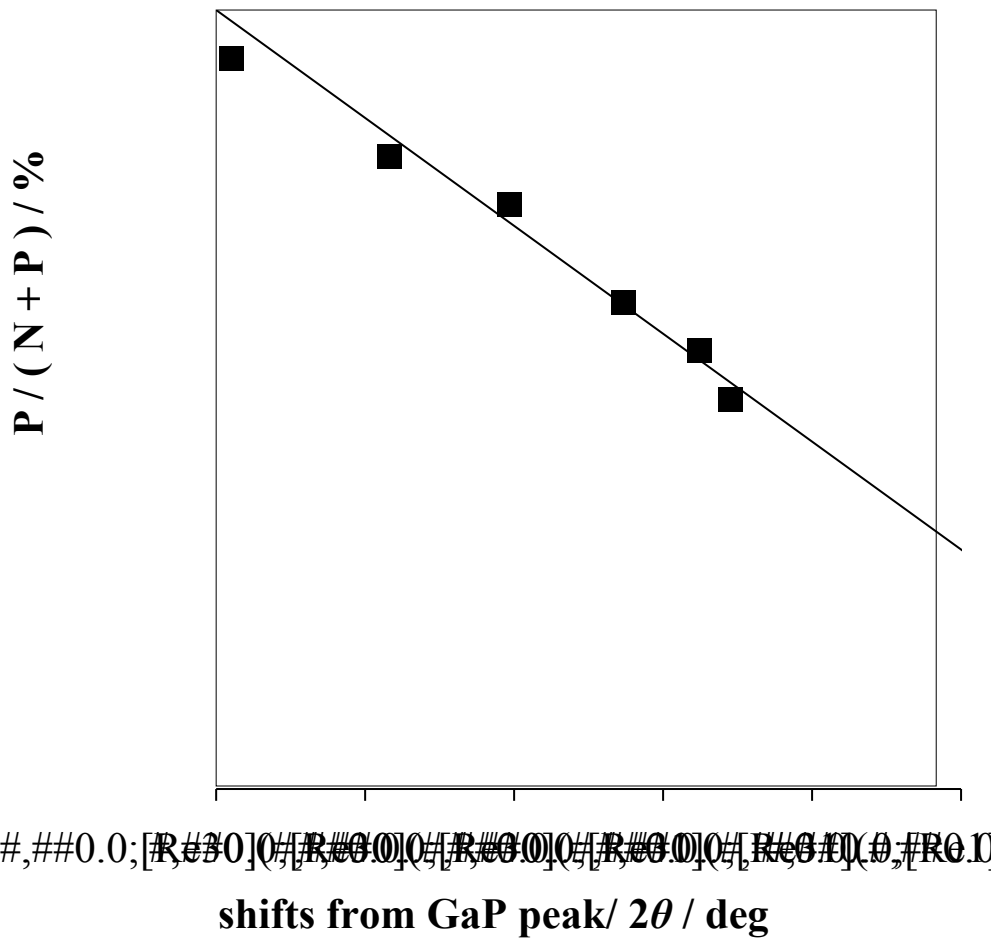

Fig. S3. Plots of  $P/(N+P) \times 100$  vs. shifts of diffraction peak from GaP.  
Cluster model for  $\text{Ga}_{32}\text{P}_{32-x}\text{N}_x$  ( $x=1\sim 8$ ).
